# Supplementary material for: Building customizable auto-luminescent luciferase-based reporters in plants
Source: eLife. 2020 Mar 25;9:e52786. doi: 10.7554/eLife.52786 (PMC7164954; doi:10.7554/eLife.52786)
Supplement: Figure 1—source data 1. [file elife-52786-fig1-data1.xlsx]

## Sheet: 190715 - fungal luc high replic
	Area	Mean	Min	Max	Genotype	Replicate
1	6376	38.27	20	232	Pathway 2	1
2	6376	70.191	21	374	Pathway 2	2
3	6376	24.956	20	45	Pathway 2	3
4	6376	48.91	20	253	Pathway 2	4
5	6376	51.845	20	216	Pathway 2	5
6	6376	100.701	20	698	Pathway 2	6
7	6376	44.206	20	181	Pathway 2	7
8	6376	43.698	20	240	Pathway 2	8
9	6376	62.312	20	542	Pathway 2	9
10	6376	44.463	20	258	Pathway 2	10
11	6376	51.835	20	283	Pathway 2	11
12	6376	41.932	21	253	Pathway 2	12
13	6376	49.32	21	270	Pathway 6	1
14	6376	70.657	21	510	Pathway 6	2
15	6376	59.34	20	357	Pathway 6	3
16	6376	39.079	20	194	Pathway 6	4
17	6376	30.192	20	78	Pathway 6	5
18	6376	36.878	20	253	Pathway 6	6
19	6376	29.656	20	109	Pathway 6	7
20	6376	48.01	20	261	Pathway 6	8
21	6376	42.744	20	278	Pathway 6	9
22	6376	59.923	20	312	Pathway 6	10
23	6376	32.908	20	119	Pathway 6	11
24	6376	55.643	20	285	Pathway 6	12
25	6376	23.116	20	27	Pathway 8	1
26	6376	23.054	20	257	Pathway 8	2
27	6376	23.125	20	196	Pathway 8	3
28	6376	22.752	20	26	Pathway 8	4
29	6376	22.875	20	220	Pathway 8	5
30	6376	22.616	20	31	Pathway 8	6
31	6376	22.555	20	26	Pathway 8	7
32	6376	22.545	20	26	Pathway 8	8
33	6376	22.461	19	33	Pathway 8	9
34	6376	22.585	20	35	Pathway 8	10
35	6376	22.636	20	33	Pathway 8	11
36	6376	22.294	20	31	Pathway 8	12
37	6376	23.136	20	36	Pathway 10	1
38	6376	23.498	20	38	Pathway 10	2
39	6376	23.281	20	32	Pathway 10	3
40	6376	23.004	20	213	Pathway 10	4
41	6376	23.349	20	263	Pathway 10	5
42	6376	22.847	20	27	Pathway 10	6
43	6376	22.848	20	33	Pathway 10	7
44	6376	22.646	20	38	Pathway 10	8
45	6376	22.656	20	29	Pathway 10	9
46	6376	22.756	20	76	Pathway 10	10
47	6376	23.229	20	362	Pathway 10	11
48	6376	22.58	19	26	Pathway 10	12
49	6376	23.354	20	241	Pathway 11	1
50	6376	22.858	20	39	Pathway 11	2
51	6376	22.96	20	30	Pathway 11	3
52	6376	22.972	20	94	Pathway 11	4
53	6376	23.279	20	514	Pathway 11	5
54	6376	22.677	20	33	Pathway 11	6
55	6376	23.137	20	816	Pathway 11	7
56	6376	22.637	20	30	Pathway 11	8
57	6376	22.549	19	26	Pathway 11	9
58	6376	22.498	20	45	Pathway 11	10
59	6376	22.513	20	26	Pathway 11	11
60	6376	22.495	19	38	Pathway 11	12
61	6376	25.682	20	66	p35s:Firefly Luc	1
62	6376	25.064	21	56	p35s:Firefly Luc	2
63	6376	29.54	20	103	p35s:Firefly Luc	3
64	6376	26.426	20	65	p35s:Firefly Luc	4
65	6376	29.845	20	102	p35s:Firefly Luc	5
66	6376	24.422	20	57	p35s:Firefly Luc	6
67	6376	25.311	20	74	p35s:Firefly Luc	7
68	6376	25.023	19	45	p35s:Firefly Luc	8
69	6376	31.545	19	134	p35s:Firefly Luc	9
70	6376	24.899	20	161	p35s:Firefly Luc	10
71	6376	28.226	20	72	p35s:Firefly Luc	11
72	6376	27.324	20	69	p35s:Firefly Luc	12
73	6376	23.013	20	29	Pathway 2 agro	1
74	6376	22.867	20	91	Pathway 6 agro	1
75	6376	23.101	20	402	Pathway 8 agro	1
76	6376	22.809	20	140	Pathway 10 agro	1
77	6376	22.607	20	41	Pathway 11 agro	1
78	6376	22.806	19	30	p35S agro	1
