# Supplementary material for: Building customizable auto-luminescent luciferase-based reporters in plants
Source: eLife. 2020 Mar 25;9:e52786. doi: 10.7554/eLife.52786 (PMC7164954; doi:10.7554/eLife.52786)
Supplement: Figure 1—source data 2. [file elife-52786-fig1-data2.xlsx]

## Sheet: Sheet1
Genotype	Background subtracted luminescence	Replicate
Pathway 2	6.7648	1
Pathway 2	0.7408	2
Pathway 2	0.3878	3
Pathway 2	0.8438	4
Pathway 2	-0.1972	5
Pathway 2	-0.1962	6
Pathway 2	1.3028	7
Pathway 2	4.7068	8
Pathway 2	8.5378	9
Pathway 2	6.6828	10
Pathway 2	10.5318	11
Pathway 2	1.6198	12
Pathway 6	0.4938	1
Pathway 6	2.3738	2
Pathway 6	6.7948	3
Pathway 6	2.5458	4
Pathway 6	0.5778	5
Pathway 6	5.1668	6
Pathway 6	10.5258	7
Pathway 6	3.2018	8
Pathway 6	25.3068	9
Pathway 6	15.0768	10
Pathway 6	15.1878	11
Pathway 6	26.0188	12
