# Supplementary material for: Building customizable auto-luminescent luciferase-based reporters in plants
Source: eLife. 2020 Mar 25;9:e52786. doi: 10.7554/eLife.52786 (PMC7164954; doi:10.7554/eLife.52786)
Supplement: Figure 1—source data 3. [file elife-52786-fig1-data3.xlsx]

## Sheet: Sheet1
Caffaeic acid pathway	Dpi	Technical Replicate	Date	Luminesence (AU)	Biological Replicate
negative	3	1	191204	65.418	1
negative	3	2	191204	68.327	1
negative	3	3	191204	60.928	1
positive	3	1	191204	73.719	1
positive	3	2	191204	71.371	1
positive	3	3	191204	73.737	1
positive	3	1	200112	22.675	2
positive	3	2	200112	22.941	2
positive	3	3	200112	19.703	2
positive	3	4	200112	19.209	2
positive	3	5	200112	15.629	2
positive	3	6	200112	16.523	2
negative	3	1	200112	14.453	2
negative	3	2	200112	18.297	2
negative	3	3	200112	14.688	2
negative	3	4	200112	3.297	2
negative	3	5	200112	4.901	2
negative	3	6	200112	7.441	2
positive	5	1	191207	45.296	3
positive	5	2	191207	46.494	3
positive	5	3	191207	41.609	3
positive	5	4	191207	53.721	3
positive	5	5	191207	50.181	3
positive	5	6	191207	45.347	3
negative	5	1	191207	38.874	3
negative	5	2	191207	44.811	3
negative	5	3	191207	44.857	3
negative	5	4	191207	37.376	3
negative	5	5	191207	43.766	3
negative	5	6	191207	42.126	3
positive	5	1	191207	63.677	1
positive	5	2	191207	57.659	1
positive	5	3	191207	62.339	1
positive	5	4	191207	56.653	1
positive	5	5	191207	72.303	1
positive	5	6	191207	65.377	1
negative	5	1	191207	60.185	1
negative	5	2	191207	53.233	1
negative	5	3	191207	49.13	1
negative	5	4	191207	43.826	1
negative	5	5	191207	47.888	1
negative	5	6	191207	46.975	1
