# Supplementary material for: Building customizable auto-luminescent luciferase-based reporters in plants
Source: eLife. 2020 Mar 25;9:e52786. doi: 10.7554/eLife.52786 (PMC7164954; doi:10.7554/eLife.52786)
Supplement: Figure 3—source data 1. [file elife-52786-fig3-data1.xlsx]

## Sheet: Sheet1
Luminescence
947164
1512639
444687
789355
347861
219115
778296
418201
13
0
1300
0
3
0
0
1347361
1927493
627251
943535
392221
237626
836314
489459
17
0
834
6
0
0
0
1757701
2543340
703506
1343273
456064
329522
1178746
712014
236
0
1009
0
0
1
1
2083328
3384440
758766
2032850
585725
445132
1778219
957159
914
0
1554
0
0
0
0
2033731
3219231
714472
2285239
690039
444922
1935754
977160
4007
0
2106
0
0
0
0
1829311
2660572
747003
2074802
678230
416392
1709953
910442
9347
0
1937
0
0
0
0
1640038
2166127
843554
1868657
611722
381929
1469001
832790
17032
0
1456
0
0
0
2
1486100
1824087
949575
1769263
571517
356865
1313283
750294
26321
0
1073
0
0
0
0
1394203
1571776
1028654
1714852
581675
334693
1202970
676150
31812
0
648
0
0
0
0
1262626
1382585
1010233
1641099
610218
307449
1074618
608878
33321
0
184
0
0
0
0
1107765
1220273
891449
1551841
624196
271634
976819
538680
29999
0
0
0
0
0
0
963359
1098246
736201
1551009
668942
245948
968292
502129
29282
0
0
0
0
0
0
870389
1021945
618153
1638713
749480
238309
974782
483346
35062
0
0
0
0
0
0
798381
960279
529057
1773834
857758
235034
984193
472971
41434
0
1
0
0
0
0
717223
876364
435048
1868105
927905
223559
947416
447687
47159
0
0
0
0
0
0
648128
804224
361316
1919585
945601
214310
904607
431843
59392
0
3
0
0
0
0
593813
744937
303460
1910050
914372
212163
862915
426612
76822
0
22
0
0
0
0
552104
690637
261807
1847086
856724
217050
832220
427120
90439
1
66
0
0
0
4
523638
643285
234683
1741863
791464
226290
816799
430388
96850
18
140
0
0
0
21
506975
603452
221869
1607821
716198
238170
784658
428252
104219
62
191
0
0
0
35
484096
557577
210630
1468290
649482
248795
770127
432896
97396
73
164
1
0
0
25
470505
521980
208430
1320739
560224
252131
724281
427655
115578
178
140
0
0
0
27
467005
490877
209479
1186185
471331
256847
667678
413343
139212
277
79
0
0
0
29
482898
467085
217386
1083579
403488
262484
616682
393010
164158
255
25
0
0
0
30
511041
454496
228190
1020223
359576
270865
576435
372902
178528
310
18
0
0
0
37
546309
442976
236056
968744
324108
281323
540655
347934
181499
250
10
0
0
0
36
599921
457246
262055
941914
298461
294590
519381
332421
186151
425
16
0
0
0
41
639342
489206
296713
928543
277659
310886
508237
322898
197185
726
28
0
0
0
39
673633
531353
340271
933627
266732
330593
518305
322044
212138
1215
62
0
0
0
31
679316
573967
360137
929308
253698
368419
544247
322743
248559
1948
277
0
0
0
17
659621
605384
380400
938570
244584
399613
591966
326317
263034
2677
900
0
0
0
7
625021
622718
383918
947235
239030
399742
628930
332965
255340
3607
2115
0
0
0
3
584052
639755
369440
956242
234523
383749
632170
339589
234464
5004
4031
0
0
0
4
546067
647680
344224
922988
225446
366738
612350
340898
228113
7075
6000
0
0
0
14
512677
642182
316546
872009
211188
341705
583179
340691
237171
9835
7811
0
0
0
47
479052
620861
285310
818552
196904
298876
565828
337141
236625
12047
8905
0
0
0
79
458624
604280
262703
767838
185684
283200
564999
344250
241794
13893
9501
0
0
0
132
443655
587168
245451
713848
176185
270563
580469
350574
241139
15121
9409
0
0
0
186
430440
568418
233704
667364
166804
248299
591491
353898
238457
15964
9297
0
0
0
230
410610
547100
218381
627396
157052
236494
597438
354712
235433
16581
9445
0
0
0
254
394326
532023
204086
590314
147809
227606
594071
354337
231201
17428
9938
0
0
0
249
377487
519581
187621
556663
140379
217713
590901
354982
225980
18478
10514
0
0
0
240
365969
506651
171363
527103
134213
215333
590947
357155
220382
19485
10893
0
0
0
228
365349
502177
161147
509892
129732
212574
580979
356903
221223
20540
10779
0
0
0
190
369783
504616
151296
498882
127253
213169
565160
350588
213708
21896
10728
0
0
0
151
383591
521913
148430
492994
123914
210552
551607
346678
212551
23662
10990
0
0
0
144
406082
548279
147160
487804
119586
214503
541139
346524
210145
24816
10845
0
0
0
148
448152
593487
151835
483430
114296
215579
546943
346779
203603
24661
10052
0
0
0
149
496510
645957
161052
475083
108387
215958
565227
350393
195890
23243
8871
0
0
0
133
540220
682710
170100
467886
101997
219614
588174
355467
184908
20396
7209
0
0
0
91
582150
722253
183825
471919
97009
226916
626493
359662
176672
18463
6080
0
0
1
55
630114
752830
202679
477076
94457
251583
677296
364275
172284
17278
5342
0
0
0
35
646967
734908
224703
488852
94404
259683
721092
368740
168224
16448
5094
0
0
0
26
658069
710225
250349
515030
96445
272394
743071
370228
167905
17164
5858
0
0
2
26
647248
668750
273342
541717
98733
297536
740962
365098
169270
18925
7144
0
0
1
30
609053
604810
285596
560907
100296
297153
717333
353969
166642
19951
7900
0
0
0
31
555117
539325
285886
569994
100747
293157
672132
335734
159771
20049
7944
0
0
0
33
496013
482460
276799
565111
100172
279008
618697
317540
153393
20410
7992
0
0
0
38
441260
437944
260496
548611
99385
263770
565294
304471
148748
21589
8453
0
0
0
44
391811
397302
240959
526988
96343
253032
551307
300585
138738
23021
9412
0
0
0
54
349175
361816
220335
512418
96280
249063
538731
297628
134650
23235
9672
0
0
0
59
316064
330415
200325
500229
96993
254392
551436
297712
131332
23810
10144
0
0
0
64
282136
299828
179204
489188
96535
248360
551095
292671
127620
24021
10319
4
0
0
68
251344
271871
160467
482515
96029
240260
543850
285396
124130
24518
10574
0
0
1
78
224051
248272
143894
476995
95541
237691
531684
277271
120752
25216
10889
1
0
0
87
200182
228533
129490
471719
95641
231184
516242
268592
117081
25869
11177
0
3
0
99
178247
209635
117366
467641
94908
225940
499742
260130
113452
26425
11360
0
0
0
112
161987
195942
107847
468215
96615
214233
459758
245402
119947
26974
11347
647
2
0
127
142059
178781
95131
462286
93561
204131
414623
225803
116054
27104
11027
863
0
0
149
125468
165126
85721
460359
90662
190569
371851
209484
111479
26962
10585
1045
0
1
165
111809
153221
77432
468223
88750
180575
345626
199718
105119
26223
9907
1225
0
3
171
98948
141719
69673
484842
86538
176037
334693
192591
97380
24195
8687
1086
0
1
155
89829
136032
65274
519039
86306
177520
337077
188596
91578
22775
8062
1243
0
1
135
82605
132046
60016
554285
86592
177612
335920
184965
85486
21218
7409
1247
0
1
113
75848
128003
55536
585236
87396
180676
333855
181164
79274
19493
6661
1023
0
0
94
69976
124022
51065
618930
89132
187107
327318
178391
73552
17964
6015
775
1
0
77
64612
120065
46206
659656
91831
192527
321874
174436
68019
16345
5304
433
0
1
42
60906
116670
43986
708451
96894
199540
318500
171686
64501
15802
5191
354
1
0
35
59607
115346
44714
768150
104348
204277
315268
170655
63330
16551
5750
547
0
0
35
57709
110943
44954
824661
112328
203039
307257
168515
62573
17433
6187
788
0
2
32
54815
103941
44520
875961
119756
198340
297680
165433
61295
18015
6372
970
0
1
31
52140
97453
43721
897257
125853
186884
288576
161676
60389
18506
6549
1280
0
1
30
48541
89991
41384
884271
129557
172741
276813
156828
59170
18550
6475
1517
4
2
24
42860
79926
37326
849644
127814
166905
282237
158180
47697
18441
6429
0
0
0
20
40201
73707
34942
811819
132695
161821
282564
157886
46309
18183
6339
1
0
0
14
37840
68434
32703
772437
139152
161225
291446
159062
45110
17914
6268
1
2
2
9
35267
62735
30050
733824
143169
156170
294873
158446
43623
17486
6077
1
0
0
6
33213
57801
27989
695998
146346
151037
291923
156124
42007
17036
5906
0
0
0
4
31235
53111
26027
659357
147849
144225
286002
152541
40061
16519
5704
5
1
0
6
29008
48384
23667
617619
147799
139025
278682
147732
37684
15759
5378
0
1
2
3
26974
44421
21734
576221
146927
133054
268554
142227
35419
15037
5094
0
1
0
2
27474
44736
21695
537506
146495
121685
245007
132918
45123
14373
4860
4594
5
36
1
25492
42176
20135
497194
137316
111978
221654
122225
43163
13568
4490
4785
8
41
1
24015
40731
19370
464390
128741
104899
199427
113799
41616
12701
4154
5057
8
46
2
22608
39427
18761
431086
122393
102976
188380
109070
40234
11745
3843
5278
11
52
1
20970
36697
17851
405177
120950
107158
195733
118114
40677
12098
6538
5763
1153
234
6
