# Supplementary material for: Building customizable auto-luminescent luciferase-based reporters in plants
Source: eLife. 2020 Mar 25;9:e52786. doi: 10.7554/eLife.52786 (PMC7164954; doi:10.7554/eLife.52786)
Supplement: Figure 3—source data 2. [file elife-52786-fig3-data2.xlsx]

## Sheet: Sheet1
Luminescence
32
1181
1
2
2
3
71
52
5117
867
258789
125324
11511
8612
2986
9556
8034
6927
22942
6577
1698
9
1411
0
1
0
2
147
286
7023
1218
331497
171261
12794
12334
3557
12031
10215
8126
31423
7918
2113
169
2802
2
10
2
34
469
529
10721
2202
368467
220153
17792
22209
7287
15991
13585
10448
43716
9729
4209
410
3371
4
99
2
70
518
527
12579
2428
397189
242816
20216
31462
10450
18207
15396
12913
51306
11499
5787
1025
3969
22
422
5
210
579
529
14540
2526
436953
251740
22808
38285
13526
20220
18590
16194
56623
13675
7773
2344
4521
78
1181
5
451
675
553
16326
2518
457950
245665
25027
39385
16746
22369
21363
19971
61524
16379
9941
4564
5269
197
2277
35
829
795
568
18337
2532
459169
240327
27483
37780
20438
24278
24073
23153
66596
18717
11804
8514
6549
429
3452
117
1342
984
628
21570
2697
466001
239129
30647
39165
23911
25836
26516
25418
69387
20560
13286
15126
8018
848
4575
223
1880
1158
659
25246
2770
452252
233671
33427
41391
25808
26647
28058
26470
67054
21923
14033
25497
10194
1456
5576
337
2729
1453
777
29216
2939
428610
222979
36230
40491
26135
26744
28328
26597
62919
22377
14553
39228
12866
2203
6369
422
3264
1682
868
32696
3019
414017
209932
38492
36175
25764
26244
28217
26018
58612
22430
14740
58343
16869
3258
7267
518
3752
1982
1039
35817
3165
404287
197416
40798
31701
25362
25760
28455
25682
54851
22275
15127
83142
21738
4611
7996
589
3859
1529
542
37440
2624
399664
189358
42254
29522
24138
23386
27823
24070
52564
20022
15021
116990
28148
6340
9191
688
4542
1638
668
39433
2774
401372
186582
43235
29921
23561
22652
27795
23765
53250
19495
15653
157945
35352
8156
10170
800
5203
1684
764
40353
2795
399422
179499
43197
30190
23261
21950
27677
23464
52399
18965
16180
206346
43467
10313
11066
935
5894
1728
887
41045
2832
395681
170520
42943
29291
22940
21273
27761
23258
50880
18594
16815
260592
52589
12873
11890
1089
6615
1815
1018
41913
2891
398914
162278
43031
27741
22560
20694
28106
23076
50676
18241
17634
315549
62116
15465
12556
1219
7192
1921
1129
42776
2906
402319
154247
42588
26079
22305
19955
28514
22893
51310
18010
18454
367865
71934
18441
13222
1405
7621
2063
1253
43624
2898
401513
145950
41818
24777
22034
19212
28694
22716
52096
17750
19354
416054
81661
21442
13845
1624
7768
2236
1386
44014
2941
395090
137585
40972
23824
21765
18472
28705
22494
52664
17212
20317
454880
88534
22520
13256
1471
7412
2611
1889
43536
3007
376807
124884
38109
21536
20403
18468
28482
22924
51737
18611
20872
466909
89806
23107
13388
1806
7550
3124
2309
42642
3329
321374
108462
35609
18596
20188
17968
27573
22530
48620
18163
22088
499887
96814
25898
14512
2221
8257
4047
2845
48009
3812
294489
107453
33196
18266
19770
17695
27795
22273
49210
17801
23838
555831
109986
28786
15158
2397
8581
4640
3055
54350
3812
306648
107091
30726
18095
19094
16743
28469
21931
49789
17178
24841
596218
123207
31985
16566
2871
8982
5682
3616
60767
4262
307169
105788
29424
18142
19308
16364
29318
22410
50376
16976
26092
630475
135733
35712
17768
3404
9659
6903
4325
68180
4655
307538
103737
28364
18048
19420
15864
30180
23032
51144
16669
27126
654298
147570
39377
18857
3951
10490
8487
5340
77741
5206
312901
101955
27610
18198
19689
15376
31202
23904
52606
16516
28000
676717
158231
42289
19676
4627
11466
10364
6734
88189
5902
320909
100519
27240
18305
20101
14929
32406
24725
54581
16502
28731
693972
168056
45276
20709
5461
13568
12567
8619
100005
6988
325446
99941
27159
18484
20613
14660
33727
25591
56783
16793
29352
703132
175215
48065
21773
6551
16149
14849
10637
111521
8303
326299
99745
27200
18765
21252
14356
34904
26480
58617
17267
29638
697774
177727
50362
22937
7792
18883
17139
12679
121962
9947
324089
100035
27508
19234
22079
14332
36008
27527
60393
17979
29768
681031
175102
51404
23682
8985
21307
18837
14192
130655
11168
318261
98821
27069
19366
22487
13990
36417
28169
61248
18483
29238
656861
170305
51868
24397
10236
25251
20250
15428
137341
12214
311037
96321
26387
19224
22609
13667
36411
28617
61678
18879
28566
633693
166274
52741
25670
11867
25404
21617
16313
142301
13486
303569
93860
26103
19193
23071
13753
36314
29166
62015
19248
28217
613365
161784
53372
26353
12878
24410
22103
16480
137591
13981
294220
90337
25176
18684
22643
13321
35435
29012
61272
19017
27383
595242
157053
54130
26789
13618
23886
22227
16446
132821
14233
285011
86844
24236
17963
22024
12839
34345
28436
60051
18399
26537
580555
152801
55468
27310
14363
22548
21135
15081
126580
13578
277868
83809
23393
17269
20758
10861
32145
26266
58533
14550
25245
572534
149995
57724
28304
15091
20482
21307
14846
114592
13515
269755
81762
22460
16663
20110
10382
30889
25178
57489
13593
24772
565776
147270
59775
29326
15788
16878
21301
14635
89219
13347
261217
79863
21265
15942
19492
9940
29761
24077
56212
12694
24303
557234
144284
61781
30163
16314
13249
21404
14390
64862
13108
252862
77206
20010
15050
18849
9519
28783
22994
54315
11876
23782
550259
140942
63922
30711
16906
10229
21691
14157
49092
12931
245055
74140
18817
14160
18246
9114
27844
21985
52430
11088
23310
543095
137857
66463
30973
17191
8167
22053
13965
39772
12740
237249
71141
17592
13346
17680
8730
26958
21044
50471
10335
22852
534594
134899
69359
31262
17275
6817
22532
13825
33906
12639
229019
68234
16608
12646
17246
8431
26174
20296
48680
9696
22477
523619
131510
72017
31084
17095
5885
22796
13638
30521
12344
219412
64936
15422
11907
16624
8003
25239
19473
46711
9031
21970
510469
128213
73531
30925
17796
5459
24274
15096
28936
12985
207125
61628
14319
11198
16749
9219
25377
20083
44919
12054
22145
484805
122135
72930
30202
17894
5013
24541
15222
27898
12924
193724
57566
13324
10500
16386
8982
24455
19233
42574
11681
21194
472405
118905
73002
29559
17392
4770
24694
15330
27031
12889
179971
54538
12465
9764
15837
8680
23348
18251
40236
11269
20583
469435
119904
74480
30445
15991
4499
26003
15395
25928
13081
172402
52491
11802
9123
15460
8337
22668
17454
39025
10894
20448
459350
120726
75831
31824
13658
4182
27670
15355
24704
13325
169123
50411
11270
8588
15367
8063
22347
16773
38162
10544
20274
443162
120122
76529
33036
10967
3875
29007
15253
23377
13559
166312
48435
10806
8094
15358
7857
22141
16242
37343
10280
19945
426063
118281
77266
34205
8526
3563
29913
15105
21974
13672
164122
46270
10324
7620
15295
7607
21896
15786
36672
9996
19436
408548
116022
78306
35192
6862
3287
30627
14980
20637
13721
161438
44260
9833
7206
15209
7344
21645
15400
36023
9720
18818
391597
112880
79649
35948
5905
3057
31216
14860
19420
13801
157311
42310
9470
6809
15134
7134
21507
15195
35606
9545
18199
375789
109000
80777
36308
5388
2874
31658
14765
18451
13880
152176
40594
9232
6405
15036
6927
21400
15128
35360
9398
17564
361379
104665
80622
36280
5113
2744
31892
14669
17675
13949
145870
39014
9108
5978
15040
6774
21242
15193
35089
9283
16915
348150
99924
79010
35799
4910
2632
31811
14457
16996
13804
139939
37329
8912
5501
14854
6582
20924
15303
34683
9145
16000
342485
95414
76618
35128
4791
2563
31672
14322
16465
13735
134710
35830
8807
5018
14775
6469
20667
15461
34331
9124
15235
340701
90907
73898
34001
4655
2483
31227
14050
15858
13455
130323
34242
8518
4503
14507
6268
20257
15467
33756
9016
14337
337966
86275
71323
32680
4557
2423
30658
13715
15236
13177
126724
32561
8167
3978
14158
6047
19831
15343
33095
8856
13534
330792
81456
68757
31057
4377
2334
29850
13233
14460
12699
123736
30626
7615
3451
13540
5661
19260
14986
32090
8595
12598
316025
77331
67076
29711
4248
2234
28044
10895
13602
11970
123341
29249
7502
3078
12537
4130
18037
13558
31185
4258
11097
296703
73585
65573
28575
4159
2217
27316
10574
13046
11784
121642
28002
7310
2700
12169
3914
17674
13188
30213
3887
10453
274305
69784
64038
27432
4014
2180
26467
10235
12300
11562
119028
26552
7063
2331
11788
3696
17270
12706
29062
3627
9772
