# Supplementary material for: Building customizable auto-luminescent luciferase-based reporters in plants
Source: eLife. 2020 Mar 25;9:e52786. doi: 10.7554/eLife.52786 (PMC7164954; doi:10.7554/eLife.52786)
Supplement: Figure 3—source data 3. [file elife-52786-fig3-data3.xlsx]

## Sheet: Sheet1
Luminescence
580789
618502
433064
234145
247061
273737
181689
376328
100914
124363
83783
38312
22278
8984
6876
21890
11390
8310
643916
963914
561777
348166
358832
390792
236878
469210
163118
217487
129572
49000
30737
13308
17615
28017
17609
12772
698364
1552352
601467
384302
390892
427711
255204
502220
214447
289771
162968
49423
37234
14074
18820
30818
19799
15022
661407
1610609
626447
402387
405500
450797
262961
526053
234484
311220
181504
47545
40053
14175
19306
32158
20224
15861
625172
1293389
656267
408365
410497
498209
265407
556674
228470
299264
183271
44078
40314
12994
18500
32831
19223
15365
668934
983582
681176
421644
426659
549741
276718
590760
221325
284767
183389
43999
42711
14229
20030
35639
19451
15935
771359
775341
686570
427295
440964
562211
282309
611740
209408
268555
173238
42282
43083
14026
19905
37767
18866
15689
870740
672583
691403
432591
455326
570813
289307
624943
201392
255310
169740
41418
43296
14162
20283
40173
18708
15752
872208
644097
702189
439031
467005
568536
297076
633332
190821
246021
166440
40667
43027
14292
20656
42364
18561
15724
818684
627808
714941
444830
472875
565018
302013
637512
177659
236269
161482
38815
40482
13475
19878
42560
17759
15049
734286
603622
725388
450591
477262
562390
309425
640462
168325
231643
158954
38097
39064
13424
19943
44264
17634
15010
654933
569401
731572
454628
478458
558625
317784
641087
163868
229462
157076
38150
38473
13968
20748
47122
17658
15186
583110
519550
698990
439082
460656
547412
319078
633839
159483
224997
150335
30557
35483
9625
7999
45826
13726
12574
532039
485128
707457
437680
457931
538260
321621
628050
153502
214695
143003
28005
34044
8635
6689
44657
12557
11568
484522
449806
732516
442805
460981
526059
324960
615538
150463
210018
138282
26390
32819
8312
6279
44604
12253
11249
446807
423627
748478
447523
462754
512837
328987
606312
147875
207049
135425
25988
32085
8948
6915
45508
12977
11859
405345
395068
746294
446419
460366
496726
327732
594776
139773
194187
127188
23291
29379
7984
6064
41811
11953
10904
371279
375787
747212
446712
459391
482455
329375
585552
135192
188690
123100
22689
28184
8333
6393
41178
12290
11209
342345
360317
733166
443978
456192
466589
328487
574224
130141
182766
118069
21101
26057
7993
6129
38668
11897
10865
330911
347078
726372
433040
451707
438839
327311
563048
123422
173194
112521
19672
24271
7690
5951
36196
11622
10571
337602
346435
742812
449230
463072
406897
328920
555141
117998
165306
109788
25537
24639
12112
21723
36192
15417
13337
345361
344356
713968
439089
452878
399496
326410
542373
111267
155670
104191
23418
22440
11449
21038
33229
14776
12846
357827
341064
677104
424988
439899
396826
322064
531317
104743
146744
98270
21986
21093
10189
19400
30764
13645
11956
372427
348306
644543
411991
426090
389094
319113
516804
101234
144900
96037
21318
20120
9993
19432
29521
13409
11902
417014
359100
622138
401974
415418
376073
315505
505706
99200
143181
93616
20577
19279
9812
19281
28585
13248
11879
461990
375544
601858
392019
405344
364245
308577
499497
98601
144930
93709
20304
18978
10065
19773
28203
13462
12144
521114
399544
584411
383248
395327
354669
309711
492577
99324
147524
97176
20149
18786
10758
21054
28020
14124
12812
591260
415078
565433
373116
383805
344252
303368
479594
97794
147649
97924
19245
17867
9636
19567
27326
13073
11980
637072
447920
552999
367431
375982
332812
302571
475051
99788
152703
102562
19691
18350
10694
21128
27777
14051
12908
674590
474238
541195
360954
370559
327715
301340
470358
99918
153353
105374
19357
18115
9806
19887
27756
13221
12287
674248
494627
534838
360553
364677
335543
302115
471779
102602
159520
109804
19650
18835
10425
20957
28138
13774
12792
666389
511234
530614
360211
363177
337069
302463
470029
103899
163569
112049
20040
19719
10618
21153
28890
13980
13020
640905
510119
526256
363351
359364
338377
302387
469793
103643
164737
111095
19809
19989
10403
20976
28959
13699
12768
586714
490642
519677
363523
356467
336828
299338
463390
101529
159743
107434
19119
19494
9346
19442
28652
12689
11892
540462
462630
512695
364068
354382
335486
299529
464127
100383
156876
103900
19258
19495
9835
20041
28961
13032
12243
491557
427707
502852
361750
343940
331579
296875
457903
97415
152137
99081
18544
18530
9474
19650
28082
12531
11769
443430
387387
462892
348212
321880
314970
291366
444658
94456
152443
93119
11140
15047
5289
5243
24707
8430
8322
418910
362074
457361
347574
314425
313057
290783
445733
95075
154390
92601
11044
14853
5537
5300
24093
9083
8727
400732
337532
457471
348258
311257
312230
288552
437359
95250
156075
90836
10420
14066
5096
4753
22911
8673
8311
378812
310197
455377
346894
307345
302679
282540
428647
93374
155297
87343
9875
13224
5003
4681
22162
8097
7990
363310
288272
452092
345909
304992
297976
281649
420835
93703
156797
87593
9424
12422
4769
4403
20958
8398
8003
342506
263715
445075
341817
300258
281341
274699
412495
90312
151177
82881
8948
11596
4719
4426
20090
7750
7577
326813
245372
439305
336762
297359
282611
274762
406491
90066
151027
83581
8804
11155
4749
4442
19370
8330
7968
304507
226032
430998
327385
290554
272427
268331
399711
85830
145361
78763
8148
10020
4528
4278
18159
7462
7285
292813
214764
463575
330608
302534
268693
268000
393703
85540
137771
79293
15513
12165
9092
21337
19855
11917
11107
274036
196352
451930
314921
292153
258733
262647
385139
81286
127409
74832
14959
11286
9016
21075
18724
11675
10919
254146
181117
439740
300031
277978
249089
257581
377250
77883
118855
71414
14896
11346
9127
21135
18087
11640
10942
243429
164755
424098
284879
260442
232031
251664
367091
73199
111686
67068
14202
10531
8323
19570
16849
10454
10096
250690
157696
412267
272008
245575
230347
246647
359678
75950
108773
69748
14334
10808
8728
20694
16687
11153
10601
255508
149898
400140
261304
229881
222622
241621
351417
76247
107714
70520
14197
10609
8612
20713
16185
11022
10537
258884
138850
385817
251693
213710
214025
236296
341685
73731
105329
68667
13627
9762
8048
19350
14928
9925
9828
260583
134979
374293
244403
202414
209900
232747
336415
76841
105076
71910
13740
10072
8244
20448
15162
10535
10194
273106
129741
364075
238832
190703
205487
229691
330670
77567
104663
73338
13642
10059
8222
20353
14915
10460
10179
276135
122684
355534
235072
178405
200498
226773
324325
76087
103473
73554
13048
9339
7560
18892
13683
9305
9439
288609
122576
352118
233935
171316
201270
227125
324700
80670
106231
78445
14234
10817
8817
21060
15372
10936
10719
289443
116227
346937
233717
160895
198187
224931
320564
78998
102629
78360
13257
9738
7745
19167
13870
9488
9653
300460
115406
344143
234243
154525
199534
223842
320932
80890
104323
80921
13201
9962
7773
19992
14397
9980
9862
299544
111110
341166
235818
147067
199405
222945
320334
80507
104422
80473
13491
10326
8195
20376
14834
10367
10226
295737
105640
337195
236431
139573
198514
221577
318765
79172
103053
78832
13752
10549
8612
20877
15116
10686
10533
281949
98974
332072
235285
131408
196367
218514
315670
76853
101232
75151
12831
9567
7858
20051
14187
9889
9765
261420
89210
298409
222206
117594
190696
214326
309930
76162
102589
71648
6053
7072
3605
4508
11754
6205
6325
245863
84258
287637
217125
107553
187145
211872
305859
75688
103663
69650
5322
6480
3044
3568
11019
5631
5770
226403
78001
284632
215689
98850
182413
209402
300055
73606
103487
67577
4809
5940
3050
3463
9901
5268
5210
215388
76325
284214
213158
93526
180296
208215
298033
76169
106603
69053
4970
6137
2967
3331
10575
5547
5693
198525
69771
279942
209641
85489
174311
205314
291469
72453
104200
65331
4411
5362
2828
3190
9266
5097
5037
191698
68872
277541
205596
80408
171601
204309
289688
73909
104088
65635
4762
5732
3030
3416
10045
5536
5666
175260
62298
271664
200667
72374
164705
200828
282666
68431
99730
60392
4098
4825
2713
3070
8540
4900
4818
166024
60469
268378
195839
67156
160987
198820
279862
69326
97085
60346
4121
4841
2553
2918
8871
5006
5126
158070
59982
300687
204678
64139
158049
198571
278207
66188
91158
58431
12532
7547
7838
20990
11461
9257
9236
142445
55059
296279
198870
58491
152207
195250
272758
61267
84477
54071
12205
7166
7692
20499
10944
9023
8994
129791
51433
292599
192721
53100
146096
191969
267516
57449
77764
50403
12388
7253
7912
20723
10813
9131
9056
118799
47788
287627
186301
47711
139189
187457
260711
54197
72767
47401
11945
6807
7482
20123
10077
8606
8564
112511
45489
282507
181007
43289
132898
183456
254655
52435
70636
46307
12065
6832
7540
20221
10005
8687
8652
103968
42351
274817
175718
38818
124785
177717
245478
47914
66046
42966
11463
6013
6758
18627
8398
7534
7522
103138
41896
269447
171128
35700
120651
175686
243248
49754
68717
45382
12116
6804
7578
20103
9610
8530
8538
94945
39229
260828
166177
32078
112875
170120
234969
45858
64637
42587
11558
5967
6787
18714
8044
7444
7437
95914
38705
255878
162750
29440
109095
168264
233769
47858
67173
45174
11861
6456
7297
19771
9027
8149
8239
89516
37437
250924
159340
26919
102258
164298
227784
44802
63529
43057
11600
5963
6793
18713
7862
7392
7419
87270
36919
248392
157313
25111
97518
162542
225845
44883
63905
43640
11934
6285
7099
19050
8121
7638
7661
88537
36486
246619
156066
23165
93998
161700
226348
46780
66735
46416
11819
6421
7241
19771
8716
7985
8139
83042
35182
242901
154947
21563
87929
159269
221716
43888
63902
44328
11568
5922
6738
18685
7722
7250
7347
84573
34915
240621
154790
20128
84826
159844
222812
45692
67032
45866
11680
6292
7175
19621
8612
7861
8053
79627
33748
236861
153787
18932
79175
157073
217668
42443
63651
41952
11474
5839
6724
18675
7664
7243
7324
79827
33241
233949
152949
17876
76060
157262
218044
44066
66035
42323
11631
6173
7214
19701
8540
7780
7998
71657
28973
204111
141034
15782
69756
152949
211927
43136
65847
39605
3185
3615
2358
3585
5170
4027
4109
68463
28447
190748
135792
14814
65710
150913
208304
43358
66467
38593
2877
3541
2200
3040
4917
3814
3913
65076
28116
186047
133789
14091
61831
149038
204348
43561
68442
38247
2512
3295
1931
2612
4582
3568
3688
61136
27516
182985
131885
13524
58204
147047
200102
43609
69607
37891
2502
3372
1972
2607
4571
3623
3749
58362
27003
180397
130093
13233
54925
145223
195886
43341
70093
37479
2694
3566
2235
2855
4729
3834
3947
53518
25722
175240
127140
12037
49955
140817
188191
40484
66581
34906
2575
3416
2188
2764
4357
3624
3724
49874
24434
171647
124677
11333
46671
138294
183153
39348
64982
33718
2252
3086
1875
2430
3972
3319
3422
48038
23920
170176
123321
11685
45260
138346
180975
39878
65892
33736
2199
3078
1853
2364
4049
3358
3478
49118
26132
197452
132016
12464
44200
138704
178475
39237
64221
33842
12332
5956
7344
20886
7766
7436
7804
44666
24577
196977
130303
12070
41457
136376
173225
36731
59875
31468
12021
5809
7256
20505
7646
7301
7699
40494
23090
195167
129963
10825
37650
131323
164891
33244
51590
28792
11828
5386
6620
19275
6628
6728
6854
37800
21930
187613
122012
10346
35273
128505
159299
31969
48526
27570
11803
5331
6592
19225
6573
6657
6793
