# Supplementary material for: Building customizable auto-luminescent luciferase-based reporters in plants
Source: eLife. 2020 Mar 25;9:e52786. doi: 10.7554/eLife.52786 (PMC7164954; doi:10.7554/eLife.52786)
Supplement: Figure 4—source data 1. [file elife-52786-fig4-data1.xlsx]

## Sheet: Sheet1
ABA concentration	Mean luminesence	Replicate	Plant	Dpi	Background subtracted
100	60.033	1	1	3	No
100	58.634	2	1	3	No
100	50.429	3	1	3	No
50	53.414	1	1	3	No
50	50.209	2	1	3	No
50	43.786	3	1	3	No
10	57.683	1	1	3	No
10	58.086	2	1	3	No
10	48.607	3	1	3	No
5	50.719	1	1	3	No
5	53.568	2	1	3	No
5	48.286	3	1	3	No
1	45.044	1	1	3	No
1	41.611	2	1	3	No
1	40.88	3	1	3	No
0	43.762	1	1	3	No
0	42.927	2	1	3	No
0	39.534	3	1	3	No
100	30.375	1	1	3	Yes
100	28.653	2	1	3	Yes
100	18.43	3	1	3	Yes
50	20.619	1	1	3	Yes
50	17.784	2	1	3	Yes
50	19.25	3	1	3	Yes
10	24.153	1	1	3	Yes
10	23.622	2	1	3	Yes
10	24.824	3	1	3	Yes
5	15.808	1	1	3	Yes
5	19.402	2	1	3	Yes
5	17.772	3	1	3	Yes
1	10.316	1	1	3	Yes
1	9.176	2	1	3	Yes
1	11.48	3	1	3	Yes
0	9.989	1	1	3	Yes
0	9.618	2	1	3	Yes
0	9.469	3	1	3	Yes
100	8.732	1	2	3	Yes
100	12.074	2	2	3	Yes
100	14.134	3	2	3	Yes
50	9.107	1	2	3	Yes
50	8.564	2	2	3	Yes
50	12.32	3	2	3	Yes
10	3.72	1	2	3	Yes
10	1.292	2	2	3	Yes
10	1.866	3	2	3	Yes
5	7.304	1	2	3	Yes
5	7.644	2	2	3	Yes
5	7.555	3	2	3	Yes
1	7.245	1	2	3	Yes
1	7.668	2	2	3	Yes
1	5.904	3	2	3	Yes
0	2.964	1	2	3	Yes
0	3.355	2	2	3	Yes
0	3.51	3	2	3	Yes
100	4.835	1	3	3	Yes
100	11.257	2	3	3	Yes
100	7.302	3	3	3	Yes
50	1.041	1	3	3	Yes
50	2.529	2	3	3	Yes
50	1.578	3	3	3	Yes
10	0.725	1	3	3	Yes
10	2.396	2	3	3	Yes
10	0.757	3	3	3	Yes
5	2.031	1	3	3	Yes
5	4.291	2	3	3	Yes
5	2.42	3	3	3	Yes
1	2.825	1	3	3	Yes
1	3.376	2	3	3	Yes
1	3.53	3	3	3	Yes
0	1.375	1	3	3	Yes
0	1.439	2	3	3	Yes
0	1.392	3	3	3	Yes
100	7.092	1	4	3	Yes
100	11.042	2	4	3	Yes
100	6.314	3	4	3	Yes
50	3.518	1	4	3	Yes
50	11.77	2	4	3	Yes
50	7.368	3	4	3	Yes
10	5.425	1	4	3	Yes
10	6.083	2	4	3	Yes
10	5.154	3	4	3	Yes
5	2.602	1	4	3	Yes
5	2.124	2	4	3	Yes
5	3.47	3	4	3	Yes
1	4.068	1	4	3	Yes
1	4.38	2	4	3	Yes
1	6.11	3	4	3	Yes
0	2.101	1	4	3	Yes
0	1.246	2	4	3	Yes
0	2.288	3	4	3	Yes
