# Supplementary material for: Building customizable auto-luminescent luciferase-based reporters in plants
Source: eLife. 2020 Mar 25;9:e52786. doi: 10.7554/eLife.52786 (PMC7164954; doi:10.7554/eLife.52786)
Supplement: Source code 1. [file elife-52786-code1.ipynb]

# %% [code]
%pylab inline
import datetime
import pandas as pd
import numpy as np
import os
from scipy import stats
import matplotlib as mpl
import matplotlib.pyplot as plt
import itertools
import string
import seaborn as sns

# Code to plot figure 1 D
data = pd.io.excel.read_excel('/Users/arjun/Google Drive/Luminescent plants/Data/190715 - fungal luc high replicate quantification.xlsx')
data=data[(data['Genotype']=='Pathway 2')|(data['Genotype']=='Pathway 10')]

    # Background signal is 23.013 so that was subtracted from all the data. 

mean = []
for i in range(len(data['Mean'])):
    x=float(data['Mean'].iloc[i])-23.013
    mean.append(x)
    
data['Mean'] = mean

fig = sns.FacetGrid(data=data,aspect=1.2)
fig = fig.map(sns.barplot,'Genotype','Mean', palette='Greys')
fig = fig.map(sns.swarmplot,'Genotype','Mean','Replicate',palette='YlOrRd')

print(stats.ttest_ind(a=data[data['Genotype']=='Pathway 2']['Mean'],b=data[data['Genotype']=='Pathway 10']['Mean'],equal_var=False))

# Code to plot figure 1 E


data = pd.io.excel.read_excel('/Users/arjun/Google Drive/Luminescent plants/Data/190721 - fungal luc high replicate quantification second analysis.xlsx')
data

fig = sns.FacetGrid(data=data)
fig = fig.map(sns.barplot,'Genotype','Background subtracted luminescence',palette='Greys')
print(stats.ttest_ind(a=data[data['Genotype']=='Pathway 2']['Background subtracted luminescence'],b=data[data['Genotype']=='Pathway 6']['Background subtracted luminescence'],equal_var=False))

#Code for fig 1 supplementary fig 1
data = pd.io.excel.read_excel('/Users/arjun/Google Drive/Luminescent plants/Data/190715 - fungal luc high replicate quantification.xlsx')

data = data[(data['Genotype']!='p35s:Firefly Luc')&(data['Genotype']!='p35S agro')]

print(data[(data['Genotype']=='Pathway 2 agro')]['Mean'])

fig = sns.FacetGrid(data=data,aspect=5)
fig = fig.map(sns.barplot,'Genotype','Mean',palette='Greys')
fig = fig.map(sns.swarmplot,'Genotype','Mean','Replicate',palette='YlOrRd')
fig.savefig('/Users/arjun/Google Drive/Luminescent plants/Figures/190715 - fungal luc supplentary figure 1 plot.svg')

#Code for fig 1 supplementary fig 2

data = pd.io.excel.read_excel('/Users/arjun/Google Drive/Luminescent plants/Data/190721 - fungal luc high replicate quantification second analysis.xlsx')
data

fig = sns.FacetGrid(data=data)
fig = fig.map(sns.boxplot,'Genotype','Background subtracted luminescence',palette='Greys')
fig = fig.map(sns.swarmplot,'Genotype','Background subtracted luminescence','Replicate',palette='YlOrRd')


# Code to plot figure 3 A

data = pd.io.excel.read_excel('/Users/arjun/Google Drive/Luminescent plants/Data/190820 - fungal luc RAB18 ODO1 rawdata.xlsx')
# experiment started at 2PM. 

# Annotating data
genotype = ['p35S:Luz']*2 + ['pRAB18:Luz']*9 + ['p35S:Luz']*2 + ['pODO1:Luz']*5
plant = ['benthe']*11 + ['petunia']*7
replicate = [1,2,1,2,3,4,5,6,1,2,3,1,2,1,2,3,4,5]*96
treatment = ['Watered']*2 + ['Unwatered']*6  + [ 'Watered']*10

genotype_series=[]
plant_series = []
treatment_series = []
time=[]
for x in range(96):
    genotype_series = genotype_series + genotype
    plant_series = plant_series + plant
    treatment_series = treatment_series + treatment
    time = time + [x+1]*18

data['genotype'] = genotype_series
data['plant'] = plant_series
data['replicate'] = replicate
data['time'] = time
data['treatment'] = treatment_series


data = data[((data['replicate']==3)&(data['genotype']=='pODO1:Luz'))|((data['genotype']=='p35S:Luz'))]
# data = data[data['time']<36]
data = data[(data['time']<30)&(data['time']>2)]

sns.cubehelix_palette(8)
fig = sns.FacetGrid(data=data,sharey=False,aspect=2)
fig = fig.map(sns.lineplot,'time','Luminescence','genotype').add_legend()
fig.savefig('/Users/arjun/Google Drive/Luminescent plants/Figures/190820_fig5_temp_plot.svg')


# Code to plot figure 3 C

data = pd.io.excel.read_excel('/Users/arjun/Google Drive/Luminescent plants/Data/190826 - fungal luc cca1 and odo1 timecourse.xlsx')
# experiment started at 3:30PM. 

data
# Annotating data
genotype = ['p35S:Luz']*3 + ['pCCA1:Luz']*5 + ['p35S:Luz'] + ['pODO1:Luz']*5 + ['p35S:Luz']
plant = ['benthe']*8 + ['petunia']*7
replicate = [1,2,3,1,2,3,4,5,1,1,2,3,4,5,2]*96

genotype_series=[]
plant_series = []
time=[]
for x in range(96):
    genotype_series = genotype_series + genotype
    plant_series = plant_series + plant
    time = time + [x+1]*15

data['genotype'] = genotype_series
data['plant'] = plant_series
data['replicate'] = replicate
data['time'] = time

sns.cubehelix_palette(8)
fig = sns.FacetGrid(data=data,row='genotype',col='dpi',sharey=False,aspect=2)
fig = fig.map(sns.lineplot,'time','Luminescence','replicate').add_legend()

    # Night time: 35-43

data = data[(data['time']<54)&(data['time']>20)]
sns.cubehelix_palette(8)
fig = sns.FacetGrid(data=data,row='genotype',col='dpi',sharey=False,aspect=2)
fig = fig.map(sns.lineplot,'time','Luminescence').add_legend()


data = data[(data['genotype']=='pODO1:Luz')]
sns.cubehelix_palette(8)
fig = sns.FacetGrid(data=data,col='dpi',sharey=False)
fig = fig.map(sns.lineplot,'time','Luminescence',palette = 'Purple').add_legend()
fig.savefig('/Users/arjun/Google Drive/Luminescent plants/Figures/190905_ODO1_timecorse.svg')

# Code to plot figure 4 B

data = pd.io.excel.read_excel('/Users/arjun/Google Drive/Luminescent plants/Data/190906 - Rab18 dose response.xlsx')

data
sns.cubehelix_palette(8)
fig = sns.FacetGrid(data=data,col='Plant',row='Background subtracted',sharey=False,aspect=2)
fig = fig.map(sns.barplot,'ABA concentration','Mean luminesence').add_legend()

data = data[data['Plant']==1]
fig = sns.FacetGrid(data=data,col='Plant',sharey=False)
fig = fig.map(sns.barplot,'ABA concentration','Mean luminesence').add_legend()
fig.savefig('/Users/arjun/Google Drive/Luminescent plants/Figures/190906_RAB18_dose_response.svg')

# Code to plot figure 4 C

data = pd.io.excel.read_excel('/Users/arjun/Google Drive/Luminescent plants/Data/190820 - fungal luc RAB18 ODO1 rawdata.xlsx')
# experiment started at 2PM. 

# Annotating data
genotype = ['p35S:Luz']*2 + ['pRAB18:Luz']*9 + ['p35S:Luz']*2 + ['pODO1:Luz']*5
plant = ['benthe']*11 + ['petunia']*7
replicate = [1,2,1,2,3,4,5,6,1,2,3,1,2,1,2,3,4,5]*96
treatment = ['Watered']*2 + ['Unwatered']*6  + [ 'Watered']*10

genotype_series=[]
plant_series = []
treatment_series = []
time=[]
for x in range(96):
    genotype_series = genotype_series + genotype
    plant_series = plant_series + plant
    treatment_series = treatment_series + treatment
    time = time + [x+1]*18

data['genotype'] = genotype_series
data['plant'] = plant_series
data['replicate'] = replicate
data['time'] = time
data['treatment'] = treatment_series


data = data[data['time']==25]

fig = sns.FacetGrid(data=data,col='genotype',sharex=False)
fig = fig.map(sns.boxplot,'treatment','Luminescence',palette='Greys')
fig = fig.map(sns.swarmplot,'treatment','Luminescence',palette='YlOrRd')
fig.savefig('/Users/arjun/Google Drive/Luminescent plants/Figures/190820_fig6_plot.svg')
